# Supplementary material
Source: PubMed Central journal article supplement (PMC3192422)
Supplement: supp_en.2011-0219_En-11-0219SupTable_1.pdf [file supp_en.2011-0219_En-11-0219SupTable_1.pdf]

**Supplementary Table 1.** Gene Ontology Categories and Pathways for Cluster of Genes Upregulated in Differentiated SF-1-ES cells Treated with cAMP

| Category                                                                                                                                                                | Term                                              | P Value | Genes                                                                                                 |
|-------------------------------------------------------------------------------------------------------------------------------------------------------------------------|---------------------------------------------------|---------|-------------------------------------------------------------------------------------------------------|
| SP_PIR_KEYWORDS                                                                                                                                                         | Secreted                                          | 0.0003  | Prl2c3, Prl2c4, CCK, prsS12, Prl3b1, GHRH, S100A8, lipH, Mmp2, clpS, Wfdc1                            |
| SP_PIR_KEYWORDS                                                                                                                                                         | Signal                                            | 0.0003  | ctsR, lipH, Wfdc1, Prl2c3, Prl2c4, SEMA6D, Ctsq, Ctsj, CCK, prsS12, Prl3b1, GHRH, Mmp2, Tmem41a, clpS |
| SP_PIR_KEYWORDS                                                                                                                                                         | Hormone                                           | 0.0006  | Prl2c3, Prl2c4, CCK, Prl2c5, Prl3b1                                                                   |
| PIR_SUPERFAMILY                                                                                                                                                         | PIRSF001825:Prolactin/Lactogen/<br>Growth hormone | 0.0015  | Prl2c3, Prl2c4, Prl2c5, Prl3b1                                                                        |
| GOTERM_BP_FAT                                                                                                                                                           | Steroid biosynthetic process                      | 0.0063  | 1600014K23Rik, Tecr, Gm4948, CYP17A1, HSD17B2                                                         |
| GOTERM_BP_FAT                                                                                                                                                           | Lipid biosynthetic process                        | 0.0119  | 1600014K23Rik, Tecr, Gm4948, CDS1, CYP17A1, HSD17B2                                                   |
| SP_PIR_KEYWORDS                                                                                                                                                         | Disulfide bond                                    | 0.0135  | Prl2c3, Prl2c4, Ctsj, prsS12, Prl3b1, ctsR, lipH, Mmp2, clpS, Wfdc1, SEMA6D                           |
| GOTERM_BP_FAT                                                                                                                                                           | Steroid metabolic process                         | 0.0300  | 1600014K23Rik, Tecr, Gm4948, CYP17A1, HSD17B2                                                         |
| SP_PIR_KEYWORDS                                                                                                                                                         | Homodimer                                         | 0.0352  | CDX2, S100A8                                                                                          |
| PIR_SUPERFAMILY                                                                                                                                                         | PIRSF001182:Papain                                | 0.0368  | Ctsj, ctsR                                                                                            |
| SP_PIR_KEYWORDS                                                                                                                                                         | Zymogen                                           | 0.0412  | Ctsj, ctsR, Mmp2                                                                                      |
| SP_PIR_KEYWORDS                                                                                                                                                         | Protease                                          | 0.0486  | Ctsj, prsS12, ctsR, Mmp2                                                                              |
| <p><i>P</i> value represents the EASE score, a modified Fisher Exact <i>P</i>-Value, for gene-enrichment analysis. All categories with <i>P</i> &lt;0.05 are shown.</p> |                                                   |         |                                                                                                       |
